# Supplementary material
Source: Research Square preprint supplement (doi:10.21203/rs.3.rs-10231477/v1)
Supplement: Supplementary file 1 [file 8bbeab8a8897734009efcb6c.docx]

**Tables**

**Table 1.** Demographics and clinical characteristics of the subgroups according to END

| Variable | All patients  (n=813) | END group  (n=110) | Non-END group  (n=703) | p |
| --- | --- | --- | --- | --- |
| Demographic characteristics |  |  |  |  |
| Age, years | 65 (56, 75) | 65 (55, 75) | 66 (56, 76.25) | 0.159 |
| Male, n (%) | 546 (67.2) | 66 (60) | 480 (68.3) | 0.086 |
| Vascular risk factors, n (%) |  |  |  |  |
| Hypertension | 611 (75.2) | 96 (87.3) | 515 (73.3) | 0.002 |
| Diabetes | 286 (35.2) | 43 (39.1) | 243 (34.6) | 0.355 |
| Previous stroke | 162 (19.9) | 29 (26.4) | 133 (18.9) | 0.069 |
| Atrial fibrillation | 237 (29.2) | 41 (37.3) | 196 (27.9) | 0.044 |
| Hyperlipidaemia | 163 (20) | 25 (22.7) | 138 (19.6) | 0.451 |
| Smoking history | 351 (43.2) | 41 (37.3) | 310 (44.1) | 0.179 |
| Drinking history | 154 (18.9) | 18 (16.4) | 136 (19.3) | 0.458 |
| Clinical assessment |  |  |  |  |
| SBP, mmHg | 134 (119, 151) | 139 (122.5, 157.5) | 133 (118, 150) | 0.016 |
| DBP, mmHg | 73 (61, 85) | 71 (61, 85) | 74 (61, 85) | 0.260 |
| OTT, minutes | 430 (281.5, 655.5) | 456 (330, 780) | 439 (285, 657) | 0.405 |
| IVT | 199 (24.5) | 25 (22.7) | 174 (24.8) | 0.646 |
| Baseline NIHSS, score | 16 (10.5, 20) | 17 (11.5, 20.5) | 15 (10.0, 19.0) | < 0.001 |
| Successful reperfusion of blood vessels, n (%) | 786 (96.7) | 102 (92.7) | 684 (97.3) | 0.013 |
| Postoperative use of intravenous tirofiban, n (%) | 492 (60.5) | 53 (48.2) | 439 (62.4) | 0.004 |
| Onset time |  |  |  | 0.324 |
| ≤ 6 h | 320 (39.4) | 48 (43.6) | 272 (38.7) |  |
| > 6 h | 493 (60.6) | 62 (56.4) | 431 (61.3) |  |
| TOAST classification,  n (%) |  |  |  | 0.335 |
| LAA | 481 (59.2) | 64 (58.2) | 417 (59.3) |  |
| CE | 288 (35.4) | 44 (40) | 244 (34.7) |  |
| SOE | 39 (4.8) | 2 (1.8) | 37 (5.3) |  |
| SUE | 5 (0.6) | 0 (0) | 5 (0.7) |  |
| Lesion location, n (%) |  |  |  | 0.827 |
| Anterior circulation | 644 (79.2) | 88 (80) | 556 (79.1) |  |
| Posterior circulation | 169 (20.8) | 22 (20) | 147 (20.9) |  |
| Anaesthesia method, n (%) |  |  |  | 0.960 |
| Local anaesthesia | 208 (25.6) | 27 (24.5) | 181 (25.7) |  |
| Local anaesthesia combined with sedation | 597 (73.4) | 82 (74.5) | 515 (73.3) |  |
| General anaesthesia | 8 (1) | 1 (0.9) | 7 (1) |  |
| Laboratory data |  |  |  |  |
| FBG, mmol/L | 7.13 (5.99, 9.12) | 7.92 (6.20, 10.59) | 7.06 (5.98, 8.63) | < 0.001 |
| HbA1c (%) | 5.9 (5.5, 6.6) | 6.10 (5.6, 7.3) | 5.90 (5.5, 6.5) | 0.009 |
| HGB, mmol/L | 135 (122.8, 146.75) | 132 (121, 145.4) | 135.0 (123.1, 147.6) | 0.857 |
| PLT (× 109/L) | 214 (177, 256.85) | 218 (196.95., 244) | 212 (174.7, 256.3) | 0.933 |
| WBC, mmol/L | 9.41 (7.48, 11.91) | 10.26 (9.01, 12.66) | 9.07 (7.31, 11.59) | < 0.001 |
| NEU (× 109/L) | 7.32 (5.44, 9.65) | 8.48 (6.70, 11.74) | 7.06 (5.27, 9.51) | < 0.001 |
| LYM (× 109/L) | 1.32 (0.89, 1.75) | 1.17 (0.80, 1.66) | 1.32 (0.91, 1.78) | 0.090 |
| LDL-c, mmol/L | 2.71 (2.06, 3.29) | 2.76 (2.22, 3.32) | 2.73 (2.07, 3.29) | 0.978 |
| Creatinine, μmol/L | 80 (66, 97) | 81.0 (65.3, 96.55) | 79.0 (66.1, 97.0) | 0.947 |
| TC, mmol/L | 4.54 (3.81, 5.35) | 4.64 (3.81, 5.41) | 4.56 (3.81, 5.37) | 0.812 |
| TG, mmol/L | 1.12 (0.80, 1.57) | 1.11 (0.83, 1.51) | 1.12 (0.80, 1.57) | 0.652 |
| PNR | 29.23 (21.59, 39.70) | 26.14 (19.89, 35.77) | 29.95 (22.21, 40.60) | < 0.001 |
| PLR | 163.38 (119.28, 237.80) | 178.95 (119.37, 253.34) | 156.52 (116.61, 231.58) | 0.105 |
| NLR | 5.62 (3.40, 9.33) | 6.14 (3.92, 14.01) | 5.30 (3.30, 8.63) | < 0.001 |

Abbreviations: CE: cardioembolism; DBP: diastolic blood pressure; END: early neurological deterioration; FBG: fasting blood glucose; HGB: haemoglobin; LAA: large-artery atherosclerosis; LDL-c: low-density lipoprotein-cholesterol; LYM: lymphocyte; NEU: neutrophil; NIHSS: National Institute of Health Stroke Scale; NLR: neutrophil-lymphocyte; OTT: onset to treatment time; PLR: platelet‒lymphocyte ratio; PLT: platelet; PNR: platelet‒neutrophil ratio; SBP: systolic blood pressure; SOE: stroke of other determined aetiology; SUE: stroke of undetermined aetiology; TC: total cholesterol; TG: total triglycerides; WBC: white blood cell.

**Table 2.** Univariate and multivariate logistic regression analyses of the END group and the non-END group

| Variable | Univariate logistic regression analysis | | Multivariate logistic regression analysis | |
| --- | --- | --- | --- | --- |
|  | OR (95% CI) | *p* | OR (95% CI) | *p* |
| Hypertension | 2.503 (1.394–4.493) | 0.002 | 2.608 (1.313–5.179) | 0.006 |
| Atrial fibrillation | 1.537 (1.010–2.340) | 0.045 |  |  |
| SBP | 1.009 (1.000–1.017) | 0.039 |  |  |
| Baseline NIHSS | 1.037 (1.014–1.061) | 0.002 |  |  |
| Successful reperfusion of blood vessels | 0.354 (0.151–0.830) | 0.017 |  |  |
| Postoperative use of intravenous tirofiban | 0.559 (0.373–0.837) | 0.005 | 0.477 (0.296–0.768) | 0.002 |
| FBG | 1.105 (1.048–1.164) | < 0.001 | 1.076 (1.012–1.144) | 0.018 |
| HbA1c | 1.150 (1.011–1.309) | 0.034 |  |  |
| WBC | 1.118 (1.064–1.175) | < 0.001 | 1.125 (1.065–1.189) | < 0.001 |
| NEU | 1.123 (1.068–1.180) | < 0.001 |  |  |
| LYM | 0.804 (0.594–1.088) | 0.158 |  |  |
| PNR | 0.967 (0.951–0.984) | < 0.001 |  |  |
| NLR | 1.035 (1.014–1.058) | 0.001 |  |  |

Abbreviations: FBG: fasting blood glucose; LYM: lymphocyte; NEU: neutrophil; NIHSS: National Institute of Health Stroke Scale; NLR: neutrophil‒lymphocyte; PNR: platelet‒neutrophil ratio; SBP: systolic blood pressure; WBC: white blood cell.

**Table 3.** Logistic regression analysis of END based on different lesion locations

| Variable | Univariate logistic regression analysis | | Multivariate logistic regression analysis | |
| --- | --- | --- | --- | --- |
|  | OR (95% CI) | *p* | OR (95% CI) | *p* |
| Anterior circulation |  |  |  |  |
| Hypertension | 2.352 (1.269–4.357) | 0.007 | 2.241 (1.112–4.515) | 0.024 |
| Previous stroke | 1.753 (1.045–2.940) | 0.034 |  |  |
| SBP | 1.010 (1.001–1.019) | 0.031 |  |  |
| Baseline NIHSS | 1.064 (1.029–1.099) | < 0.001 | 1.040 (1.000–1.080) | 0.048 |
| Successful reperfusion of blood vessels | 0.379 (0.143–1.004) | 0.051 |  |  |
| Postoperative use of intravenous tirofiban | 0.476 (0.301–0.754) | 0.002 | 0.486 (0.282–0.837) | 0.009 |
| FBG | 1.081 (1.018–1.147) | 0.011 |  |  |
| HbA1c | 1.179 (1.025–1.357) | 0.021 | 1.192 (1.024–1.386) | 0.023 |
| WBC | 1.114 (1.047–1.184) | 0.001 | 1.108 (1.035–1.187) | 0.003 |
| NEU | 1.117 (1.050–1.18) | < 0.001 |  |  |
| PNR | 0.973 (0.955–0.990) | 0.003 |  |  |
| NLR | 1.030 (1.004–1.058) | 0.024 |  |  |
| Posterior circulation |  |  |  |  |
| FBG | 1.212 (1.074–1.367) | 0.002 | 1.196 (1.053–1.359) | 0.006 |
| WBC | 1.157 (1.050–1.275) | 0.003 |  |  |
| NEU | 1.171 (1.060–1.292) | 0.002 | 1.159 (1.047–1.283) | 0.004 |
| LYM | 0.568 (0.261–1.239) | 0.155 |  |  |
| PNR | 0.931 (0.884–0.980) | 0.006 |  |  |
| PLR | 1.002 (1.000–1.004) | 0.023 |  |  |
| NLR | 1.051 (1.013–1.091) | 0.009 |  |  |

Abbreviations: FBG: fasting blood glucose; LYM: lymphocyte; NEU: neutrophil; NIHSS: National Institute of Health Stroke Scale; NLR: neutrophil‒lymphocyte ratio; PLR: platelet‒lymphocyte ratio; PNR: platelet‒neutrophil ratio; SBP: systolic blood pressure; WBC: white blood cell.

**Table 4.** Logistic regression analysis of END based on TOAST classification

| Variable | Univariate logistic regression analysis | | Multivariate logistic regression analysis | |
| --- | --- | --- | --- | --- |
|  | OR (95% CI) | *p* | OR (95% CI) | *p* |
| LAA |  |  |  |  |
| Baseline NIHSS | 1.043 (1.014–1.074) | 0.004 |  |  |
| Successful reperfusion of blood vessels | 0.286 (0.104–0.793) | 0.016 |  |  |
| Postoperative use of intravenous tirofiban | 0.354 (0.201–0.623) | < 0.001 | 0.369 (0.195–0.699) | 0.002 |
| FBG | 1.091 (1.025–1.162) | 0.006 | 1.082 (1.008–1.161) | 0.029 |
| HbA1c | 1.132 (0.972–1.319) | 0.110 |  |  |
| WBC | 1.105 (1.034–1.182) | 0.003 |  |  |
| NEU | 1.115 (1.043–1.192) | 0.001 |  |  |
| PNR | 0.961 (0.938–0.984) | < 0.001 |  |  |
| NLR | 1.033 (1.007–1.060) | 0.011 | 1.027 (0.998–1.057) | 0.069 |
| CE |  |  |  |  |
| Hypertension | 3.876 (1.472–10.208) | 0.006 | 3.280 (1.216–8.845) | 0.019 |
| Atrial fibrillation | 3.347 (0.994–11.269) | 0.051 | 3.668 (0.994–13.528) | 0.051 |
| SBP | 1.014 (1.000–1.028) | 0.048 |  |  |
| Baseline NIHSS | 1.027 (0.988–1.068) | 0.175 |  |  |
| FBG | 1.115 (1.005–1.238) | 0.040 |  |  |
| WBC | 1.140 (1.057–1.230) | 0.001 | 1.153 (1.065–1.249) | < 0.001 |
| NEU | 1.139 (1.056–1.230) | 0.001 |  |  |
| PNR | 0.974 (0.950–0.998) | 0.034 |  |  |
| NLR | 1.041 (1.002–1.082) | 0.038 |  |  |

Abbreviations: FBG: fasting blood glucose; NEU: neutrophil; NIHSS: National Institute of Health Stroke Scale; NLR: neutrophil‒lymphocyte ratio; PNR: platelet‒neutrophil ratio; SBP: systolic blood pressure; WBC: white blood cell.

**Table 5.** Logistic regression analysis of END based on onset time

| Variable | Univariate logistic regression analysis | | Multivariate logistic regression analysis | |
| --- | --- | --- | --- | --- |
|  | OR (95% CI) | *p* | OR (95% CI) | *p* |
| Onset time ≤ 6 hours |  |  |  |  |
| Atrial fibrillation | 1.877 (1.004–3.509) | 0.049 | 2.229 (1.073–4.630) | 0.032 |
| SBP | 1.014 (1.000–1.029) | 0.051 |  |  |
| Baseline NIHSS | 1.058 (1.021–1.096) | 0.002 |  |  |
| FBG | 1.131 (1.043–1.227) | 0.003 |  |  |
| HbA1c | 1.214 (1.000–1.474) | 0.050 |  |  |
| WBC | 1.136 (1.051–1.228) | 0.001 | 1.166 (1.069–1.271) | < 0.001 |
| NEU | 1.142 (1.057–1.234) | 0.001 |  |  |
| PNR | 0.963 (0.939–0.987) | 0.003 |  |  |
| NLR | 1.045 (1.008–1.083) | 0.016 |  |  |
| Onset time > 6 hours |  |  |  |  |
| Hypertension | 3.121 (1.308–7.446) | 0.010 | 4.118 (1.634–10.380) | 0.003 |
| Previous stroke | 1.823 (1.000–3.322) | 0.050 |  |  |
| Successful reperfusion of blood vessels | 0.187 (0.068–0.510) | 0.001 | 0.239 (0.080–0.712) | 0.010 |
| Postoperative use of intravenous tirofiban | 0.498 (0.288–0.861) | 0.013 | 0.388 (0.212–0.710) | 0.002 |
| FBG | 1.086 (1.012–1.164) | 0.021 |  |  |
| WBC | 1.111 (1.041–1.186) | 0.001 | 1.078 (1.003–1.159) | 0.042 |
| NEU | 1.116 (1.045–1.191) | 0.001 |  |  |
| NLR | 1.032 (1.005–1.058) | 0.017 | 1.019 (0.998–1.040) | 0.078 |

Abbreviations: FBG: fasting blood glucose; LYM: lymphocyte; NEU: neutrophil; NIHSS: National Institute of Health Stroke Scale; NLR: neutrophil‒lymphocyte; PNR: platelet‒neutrophil ratio; SBP: systolic blood pressure; WBC: white blood cell.
